# Supplementary material for: Transcriptome Analysis Reveals Candidate Genes for Cold Tolerance in Drosophila ananassae
Source: Genes (Basel). 2018 Dec 12;9(12):624. doi: 10.3390/genes9120624 (PMC6315829; doi:10.3390/genes9120624)
Supplement: Supplementary file 1 [file genes-09-00624-s001.xls]

## Sheet: Tabelle1
Table 1. Differentially Expressed Genes in Drosophila ananassae.
Timepoint	Direction	Fast CCR	Slow CCR	Fast vs Slow
RT	up	-	-	552 (3.87%)
	down	-	-	557 (3.91%)
15 min vs RT	up	46 (0.32%)	82 (0.67%)	0
	down	11 (0.08%)	96 (0.78%)	0
90 min vs RT	up	1096 (8.00%)	1086 (7.80%)	3 (0.02%)
	down	653 (4.80%)	986 (7.10%)	0
90 min vs 15 min	up	1114 (8.00%)	1145 (8.20%)	-
	down	733 (5.20%)	666 (4.80%)	-
Table 2. Differentially Expressed Genes in Drosophila melanogaster.
Timepoint	Direction	Fast CCR	Slow CCR	Fast vs Slow
RT	up	-	-	1080 (8.10%)
	down	-	-	1075 (8.10%)
15 min vs RT	up	96 (0.73%)	142 (1.00%)	0
	down	86 (0.65%)	97 (0.72%)	1 (0.01%)
90 min vs RT	up	1258 (9.30%)	1257 (9.46%)	10 (0.08%)
	down	1342 (9.90%)	1401 (11.00%)	13 (0.10%)
90 min vs 15 min	up	1060 (7.80%)	1086 (8.00%)	-
	down	582 (4.30%)	837 (6.20%)	-
Table 3. Genes with Significant Phenotype x Cold Shock Interaction in Drosophila ananassae.
	Log2 fold change 15 min vs control		Log2 fold change 90 min vs control		Significance of interactiona
Gene	Cold-tolerant	Cold-sensitive	Cold-tolerant	Cold-sensitive	corrected P-valueb
GF14647	0.959699	0.660033	1.7301	0.275126	0.00779046
GF15058	-0.272618	-0.702254	0.229792	-0.581548	0.00934742
